# Supplementary material for: Impregnation of paclitaxel into poly(dl-lactic acid) using high pressure mixture of ethanol and carbon dioxide
Source: Royal Society of Chemistry journal article supplement (doi:10.1039/c1ra00070e), 2011-01-01
Supplement: c1ra00070e.pdf [file c1ra00070e.pdf]

Supplement Table 1  
Molecular Weight of PDLLA treated in EtOH-CO<sub>2</sub> mixture  
at 313 K, 20 MPa for 24 hours.

| PDLLA sample                | Molecular Weight |                |
|-----------------------------|------------------|----------------|
|                             | M <sub>n</sub>   | M <sub>w</sub> |
| Untreated                   | 96000            | 174000         |
| scCO <sub>2</sub> (0% EtOH) | 92000            | 165000         |
| 25% EtOH                    | 113000           | 176000         |
| 50% EtOH                    | 90000            | 165000         |
| 75% EtOH                    | 93000            | 168000         |
| 100% EtOH                   | 93000            | 154000         |
